# Supplementary material
Source: PubMed Central journal article supplement (PMC4961528)
Supplement: NIHMS794908-supplement-308700R2_Acknowledgment_Permissions.pdf [file NIHMS794908-supplement-308700R2_Acknowledgment_Permissions.pdf]

## Circulation Research

---

**From:** Paik, David Tohyun <david.t.paik@Vanderbilt.Edu>  
**Sent:** Thursday, June 02, 2016 4:14 PM  
**To:** circulation.research@circresearch.com  
**Cc:** Hatzopoulos, Antonis K  
**Subject:** Permission of acknowledgement

To whom it may concern:

I give my permission to be acknowledged in the manuscript “ CIRCRES/2016/308700R1: The BMP antagonist Gremlin 2 limits inflammation after myocardial infarction”

**David T. Paik, Ph.D.**

Antonis Hatzopoulos Lab  
Cardiovascular Medicine  
Cell & Developmental Biology  
Vanderbilt University  
[david.t.paik@vanderbilt.edu](mailto:david.t.paik@vanderbilt.edu)  
(C) 617.416.7162  
(O) 615.936.5614

## Circulation Research

---

**From:** Knapik, Ela <ela.knapik@Vanderbilt.Edu>  
**Sent:** Thursday, June 02, 2016 12:52 PM  
**To:** circulation.research@circresearch.com  
**Subject:** CIRCRES/2016/308700R1

I give my permission to be acknowledged in the manuscript “ CIRCRES/2016/308700R1: The BMP antagonist Gremlin 2 limits inflammation after myocardial infarction”

Ela W. Knapik, M.D.,  
Department of Medicine,  
Vanderbilt University Medical Center  
Light Hall 1165B  
2215 Garland Av  
Nashville, TN 37232  
[ela.knapik@vanderbilt.edu](mailto:ela.knapik@vanderbilt.edu)

## Circulation Research

---

**From:** Daniel Levic, Ph.D. <daniel.levic@duke.edu>  
**Sent:** Thursday, June 02, 2016 12:52 PM  
**To:** circulation.research@circresearch.com  
**Subject:** permission to be acknowledged

I give my permission to be acknowledged in the manuscript " CIRCRES/2016/308700R1: The BMP antagonist Gremlin 2 limits inflammation after myocardial infarction."

-Daniel Levic

## Circulation Research

---

**From:** Vineeta Kaku <vineeta.kaku@gmail.com>  
**Sent:** Thursday, June 02, 2016 1:28 PM  
**To:** circulation.research@circresearch.com  
**Subject:** Acknowledgement Permission

I give my permission to be acknowledged in the manuscript “ CIRCRES/2016/308700R1: The BMP antagonist Gremlin 2 limits inflammation after myocardial infarction”

Thanks,

Vineeta

**Vineeta Tanwar, Ph.D.**

Post-Doctoral Fellow  
Wold lab  
630-Dorothy M. Davis Heart and Lung Research Institute  
**The Ohio State University**  
473 West, 12th avenue  
Columbus, Ohio-43210  
614.292.0394 (lab)

## Circulation Research

---

**Subject:** FW: Permission to include name in Acknowledgements (CIRCRES/2016/308700R2)

---

**From:** Wang, Zhizhang [mailto:zhizhang.wang@Vanderbilt.Edu]

**Sent:** Monday, August 31, 2015 11:31 AM

**To:** circulation.research@circresearch.com

**Cc:** Paik, David Tohyun <david.t.paik@Vanderbilt.Edu>

**Subject:** Permission to include name in Acknowledgements (CIRCRES/2016/308700R2)

To whom it may concern:

I grant permission to include my name in the Acknowledgement section of the manuscript CIRCRES/2016/308700R2.  
Sincerely,

Zhizhang Wang

Research Assistant III  
Cardiovascular Medicine  
Vanderbilt University Medical Center

## Circulation Research

---

**From:** Lianli Ma <lianli@yinbox.com>  
**Sent:** Sunday, August 30, 2015 8:58 PM  
**To:** circulation.research@circresearch.com

To whom it may concern:

I grant permission to include my name in the Acknowledgement section of the manuscript  
CIRCRES/2015/306886DR1: Wnt10b gain-of-function improves cardiac repair by arteriole formation and  
attenuation of fibrosis (Paik et al.).

Sincerely,

Lianli Ma

## Circulation Research

---

**From:** Skelton, Jennifer <Jennifer.Skelton@Vanderbilt.Edu>  
**Sent:** Thursday, June 02, 2016 1:12 PM  
**To:** circulation.research@circresearch.com  
**Subject:** Acknowledgement approval

I give my permission to be acknowledged in the manuscript " CIRCRES/2016/308700R1: The BMP antagonist Gremlin 2 limits inflammation after myocardial infarction."

Thank you,  
Jennifer

Jennifer Skelton  
Manager, Vanderbilt Transgenic Mouse/ES Cell Shared Resource  
9410 MRB IV  
2213 Garland Avenue  
Nashville, TN 37232-0494  
615-936-3454  
[jennifer.skelton@vanderbilt.edu](mailto:jennifer.skelton@vanderbilt.edu)  
<http://labnodes.vanderbilt.edu>
